# Supplementary material for: Spatial and temporal variability of the freezing level in Patagonia's atmosphere
Source: Copernicus journal article supplement (doi:10.5194/wcd-5-1137-2024), 2024-09-23
Supplement: Supplementary file 1 [file wcd-5-1137-2024-supplement.pdf]

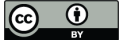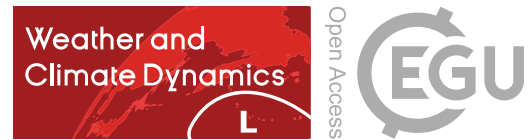

*Supplement of*

## **Spatial and temporal variability of the freezing level in Patagonia's atmosphere**

**Nicolás García-Lee et al.**

*Correspondence to:* Nicolás García-Lee (ngarcia@cecs.cl)

The copyright of individual parts of the supplement might differ from the article licence.

## Supplementary Material

- Tables

**Table S1. Average ( $\bar{H}_0$ , m a.s.l.) and Trend values ( $\bar{T}$ ,  $m\ decade^{-1}$ ) obtained annually and seasonally from  $H_0$  observation data at 12Z. Only trends with p-value < 0.05, are showed.**

|                           | $\bar{H}_0^{Annual}$ | $\bar{H}_0^{DJF}$ | $\bar{H}_0^{MAM}$ | $\bar{H}_0^{JJA}$ | $\bar{H}_0^{SON}$ | $\bar{T}^{Annual}$ | $\bar{T}^{DJF}$ | $\bar{T}^{MAM}$ | $\bar{T}^{JJA}$ | $\bar{T}^{SON}$ |
|---------------------------|----------------------|-------------------|-------------------|-------------------|-------------------|--------------------|-----------------|-----------------|-----------------|-----------------|
| <b>Puerto Montt</b>       | 2285.3               | 3007.3            | 2560.3            | 1653.7            | 1937.7            | 32.6               | 59              | 46.6            | -               | 20              |
| <b>Comodoro Rivadavia</b> | 2055                 | 2648              | 2261.9            | 1453.2            | 1871.2            | 29.4               | 42.4            | 50.4            | -               | 19              |
| <b>Río Gallegos</b>       | 1231.1               | 1661.7            | 1414              | 758.2             | 1102.6            | 20.2               | -               | 42.3            | 21              | 17.5            |
| <b>Punta Arenas</b>       | 1039.3               | 1431.7            | 1217.9            | 625.2             | 893.7             | 15                 | -               | 35.9            | 20.6            | 18.6            |

**Table S2. Statistics of the seasonal validation performed between  $H_0$  data (m a.s.l.) obtained from radiosonde data and ERA5 reanalysis data.**

|                           | $MBE^{DJF}$ | $MBE^{JJA}$ | $r^{DJF}$ | $r^{JJA}$ | $RMSE^{DJF}$ | $RMSE^{JJA}$ | $\sigma_{IGRA}^{DJF}$ | $\sigma_{ERAS}^{DJF}$ | $\sigma_{IGRA}^{JJA}$ | $\sigma_{ERAS}^{JJA}$ |
|---------------------------|-------------|-------------|-----------|-----------|--------------|--------------|-----------------------|-----------------------|-----------------------|-----------------------|
| <b>Puerto Montt</b>       | -21.3       | -41.8       | 0.95      | 0.95      | 282.3        | 224          | 859.7                 | 891.3                 | 707.9                 | 712                   |
| <b>Comodoro Rivadavia</b> | -40.5       | -29.1       | 0.95      | 0.95      | 248          | 244.1        | 765.6                 | 776.4                 | 738.4                 | 757.6                 |
| <b>Río Gallegos</b>       | -190.1      | -13.3       | 0.86      | 0.69      | 406.6        | 481.4        | 687.1                 | 641.5                 | 626.2                 | 596.4                 |
| <b>Punta Arenas</b>       | -109.7      | -123        | 0.95      | 0.87      | 237.9        | 287.9        | 769.2                 | 680.1                 | 521.5                 | 509.1                 |

**Table S3. Statistics of the values of the 0°C isotherm (m a.s.l.) obtained in annual and seasonal format. The values shown correspond to the temporal and spatial mean ( $\bar{H}_0$ ), median ( $\tilde{H}_0$ ), maximum ( $H_0^{Max.}$ ) and minimum ( $H_0^{Min.}$ ) of daily freezing levels values. Additionally, 75th percentile ( $P_{75}$ ) and 25th percentile ( $P_{25}$ ) are showed.**

|               | $\bar{H}_0$ | $\tilde{H}_0$ | $H_0^{Max.}$ | $H_0^{Min.}$ | $P_{75}$ | $P_{25}$ |
|---------------|-------------|---------------|--------------|--------------|----------|----------|
| <b>Summer</b> | 2236        | 2130.1        | 3346.2       | 1227.6       | 3034.1   | 1402.1   |
| <b>Autumn</b> | 1891        | 1722.3        | 2870         | 1068.3       | 2577.6   | 1124     |
| <b>Winter</b> | 1169        | 968.9         | 1981.8       | 575.4        | 1508.7   | 588      |
| <b>Spring</b> | 1477        | 1312.1        | 2440         | 728.3        | 1949.9   | 874.4    |
| <b>Annual</b> | 1691        | 1519.2        | 2657.7       | 913.1        | 2126.5   | 1196     |

**Table S4. Statistics of 0°C isotherm values (m a.s.l.) are presented in both annual and seasonal format. The interquartile range of the freezing level data (IQR) is depicted. Additionally, the average interquartile range for both latitudinal (IQR<sub>m</sub>) and longitudinal profiles (IQR<sub>z</sub>) is provided. Through the representation of the average ( $\bar{H}_0$ ), maximum, and minimum values, the variability is captured for each profile.**

|               | <i>IQR</i> | $\overline{IQR}_m$ | $\overline{IQR}_z$ | Max. ( $\bar{H}_{0,m} + IQR_m$ ) | Min. ( $\bar{H}_{0,m} - IQR_m$ ) | Max. ( $\bar{H}_{0,z} + IQR_z$ ) | Min. ( $\bar{H}_{0,z} - IQR_z$ ) |
|---------------|------------|--------------------|--------------------|----------------------------------|----------------------------------|----------------------------------|----------------------------------|
| <b>Summer</b> | 1632       | 290.8              | 929.7              | 3383.3                           | 1187.5                           | 3383.3                           | 931.3                            |
| <b>Autumn</b> | 1453.6     | 216.5              | 753.8              | 2848.2                           | 1065.7                           | 2858.1                           | 841.4                            |
| <b>Winter</b> | 920.7      | 159                | 500.3              | 1798.8                           | 590.7                            | 1930.7                           | 446.7                            |
| <b>Spring</b> | 1075.5     | 374.1              | 595.3              | 2448.5                           | 701.1                            | 2440.9                           | 596.1                            |
| <b>Annual</b> | 930.4      | 257.2              | 694.9              | 2625.9                           | 904.8                            | 2654.2                           | 705.4                            |

**Table S5. Trends values ( $m\ decade^{-1}$ ) obtained from each season. IQR range corresponds to the range obtained from trend values for latitudinal (IQR<sub>m</sub>) and longitudinal profile (IQR<sub>z</sub>). Through the maximum and minimum the variability is represented. Only trends with p-value < 0.05, are showed.**

|               | $\bar{T}_0$ | $T_0^{Max.}$ | $T_0^{Min.}$ | Max. ( $\bar{T}_{0,m} + IQR_m$ ) | Min. ( $\bar{T}_{0,m} - IQR_m$ ) | Max. ( $\bar{T}_{0,z} + IQR_z$ ) | Min. ( $\bar{T}_{0,z} - IQR_z$ ) |
|---------------|-------------|--------------|--------------|----------------------------------|----------------------------------|----------------------------------|----------------------------------|
| <b>Summer</b> | 39.8        | 60.7         | 18.1         | 58.3                             | 18.6                             | 68.2                             | 18.6                             |
| <b>Autumn</b> | 35.5        | 45.5         | 17.5         | 44.8                             | 17.3                             | 46.4                             | 22.6                             |
| <b>Winter</b> | 19          | 30.1         | 8.4          | 31.1                             | 10.2                             | 29.5                             | 8.9                              |
| <b>Spring</b> | 16.2        | 22.4         | 10.5         | 21                               | 10.6                             | 23.4                             | 11.9                             |
| <b>Annual</b> | 23.8        | 36.5         | 8.8          | 41                               | 6                                | 35.3                             | 9.9                              |

- **Figures**

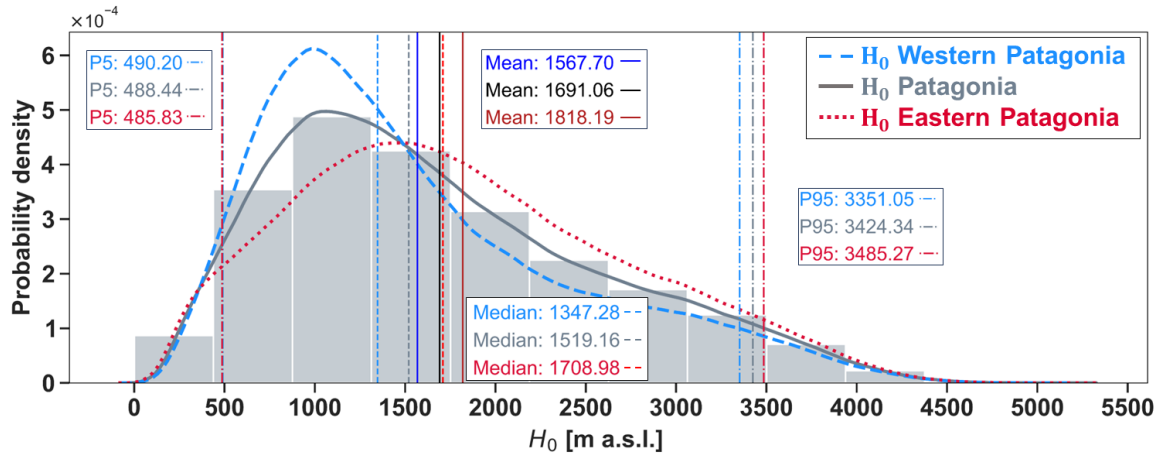

**Figure S1.** Histogram of ERA5 daily  $H_0$  data in Patagonia. The gray bars represent the daily values of  $H_0$  obtained from the spatial average across the entire study area from 1959 to 2021. The curves, indicate the fit of the kernel density estimation for the entire region (gray), Western Patagonia (blue), and Eastern Patagonia (red). Vertical lines represent the 95<sup>th</sup> percentile (P95, right dashdot line), 5<sup>th</sup> percentile (P5, left dashdot line), mean (solid), and the median (dashed) of  $H_0$  values, each calculated within their respective regions.

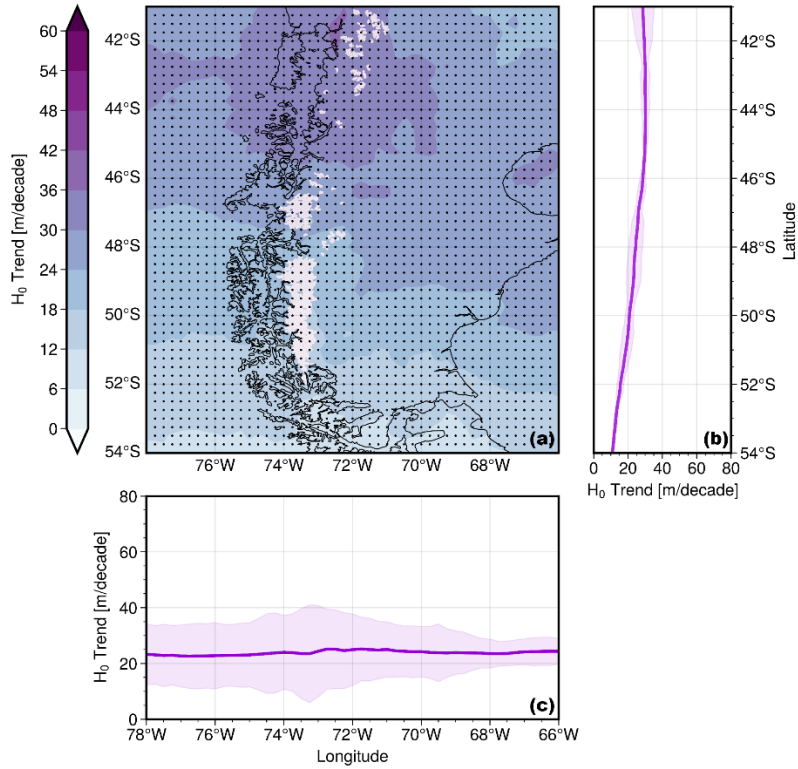

**Figure S2: Spatial distribution of the  $0^\circ\text{C}$  isotherm trends ( $T_0$ ) across the year. Lighter areas depict a lower altitude of the trends, while purple areas indicate higher values. The white contours delineate the extent of ice coverage in the region. Each distribution is accompanied by a latitudinal profile (b) and a longitudinal profile (c), showcasing the spatially averaged  $H_0$  trend values. The purple shaded area in these profiles represents the respective interquartile range for each profile ( $IQR_{m,z}$ ). Black circles denote statistically significant trends at  $p\text{-value} < 0.05$ .**

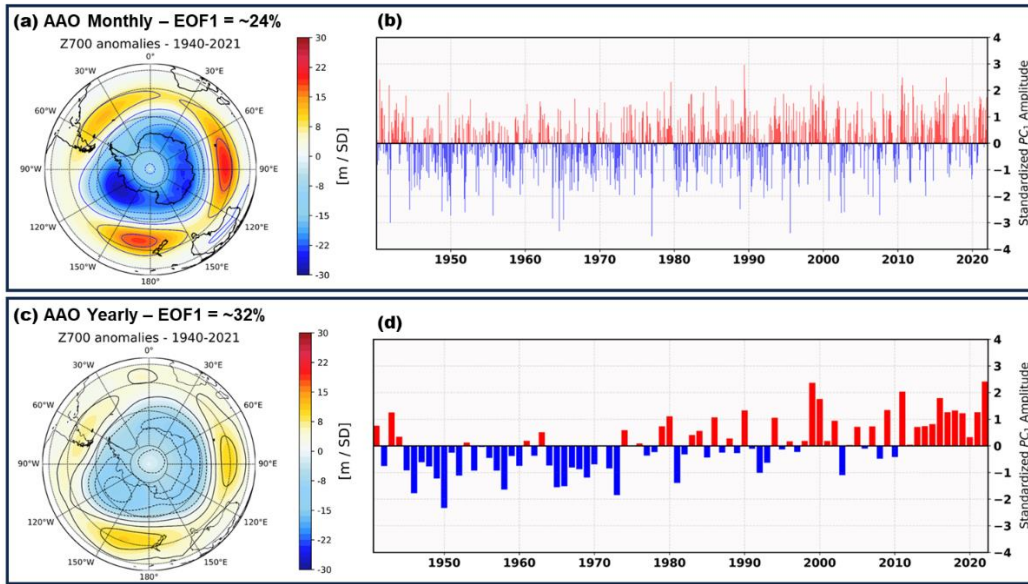

Figure S3. Leading Empirical Orthogonal Function (EOF<sub>1</sub>) of ERA5 700 hPa geopotential height through two datasets: (a) monthly mean data, and (c) annual mean data spanning from 1940 to 2021. The EOFs are generated from detrended 700 hPa geopotential height anomaly data, weighted by the square root of the cosine of latitude, within the latitude range of 20° to 90°S. The resulting patterns are displayed as regression maps, depicting the interplay between the leading Principal Component (PC<sub>1</sub>) time series and the spatial distribution of the evolving height anomalies (b and d, respectively). The temporal pattern is illustrated by blue and red bars (negatives/positive values) of the first Principal Component, scaled to unit variance (divided by the square root of its eigenvalue). Each panel includes insights into the proportion of explained variance and showcases the standardized PC time series grounded in the NOAA Climate Prediction Center's (CPC) 1979-2000 reference period.

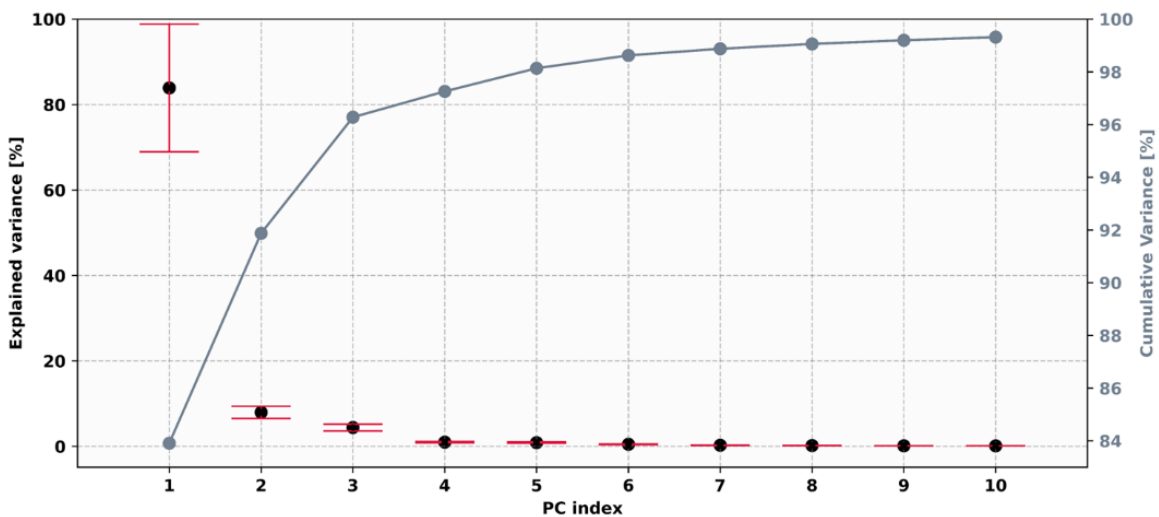

Figure S4. Eigenvalues of the top ten leading modes of variability for the annual  $H_0$  field in Patagonia, obtained through the EOF analysis (black dots), and their associated typical errors (red bars), following the method of North et al., (1982). Moreover, the accumulated percentage of the total variance explained by each principal component (gray dots) is depicted on the right axis.

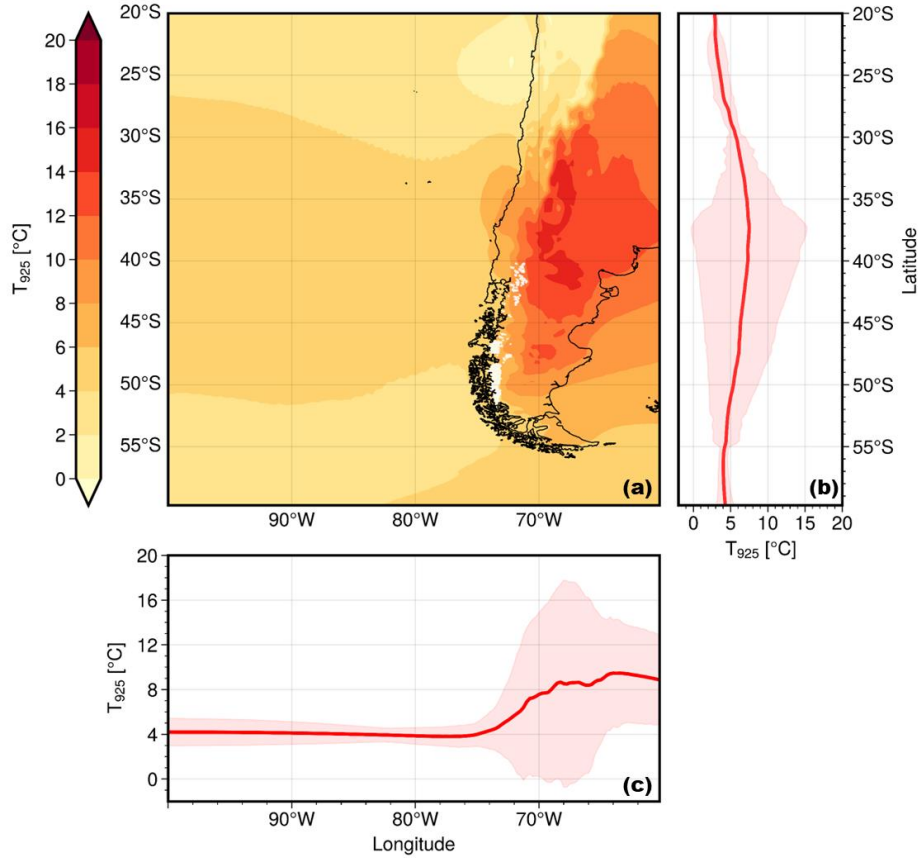

**Figure S5. Spatial distribution of the January minus July mean air temperature at 925 hPa. Lighter areas depict a lower temperature, while red areas indicate higher values. The white contours delineate the extent of ice coverage in the region. Each distribution is accompanied by a latitudinal profile (b) and a longitudinal profile (c), showcasing the spatially averaged temperature values. The red shaded area in these profiles represents the respective interquartile range for each profile ( $IQR_{m,z}$ ).**

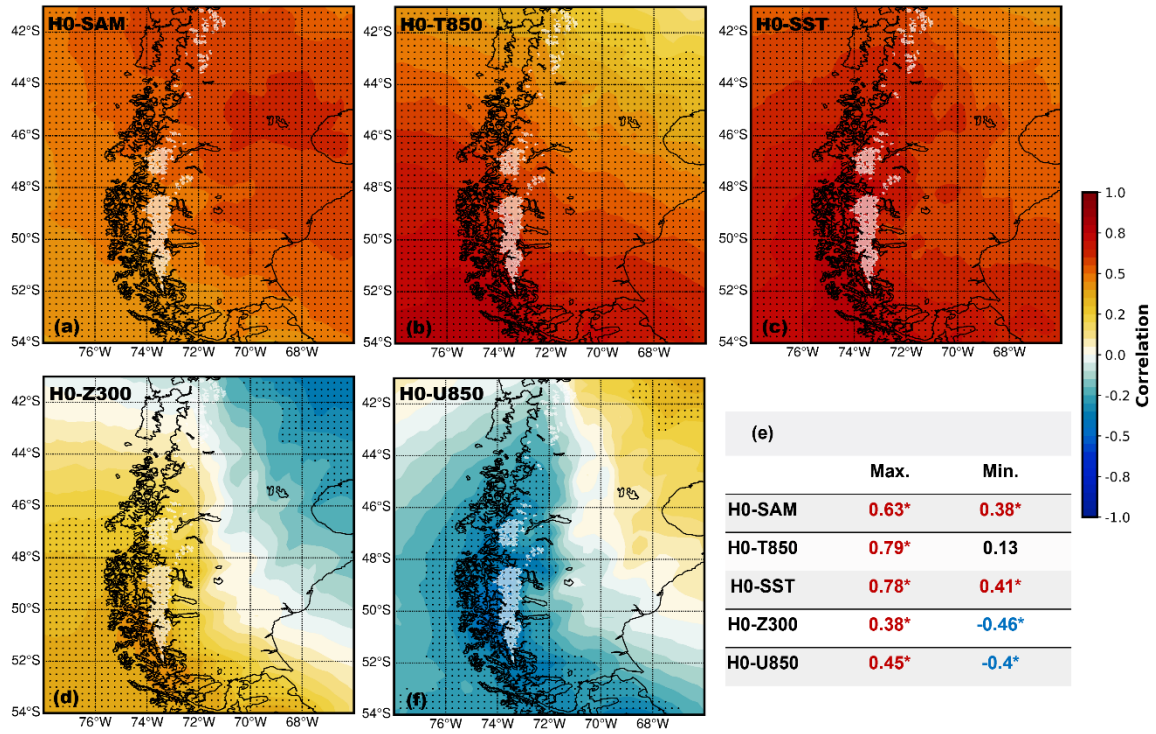

**Figure S6.** Spatial correlation maps between the detrended annual mean isotherm field and the detrended custom indices timeseries SAM (a), T850 (b), SST (c), Z300 (d), and U850 (f). The white contours outline the ice coverage boundaries within the region. Black circles denote statistically significant correlations. (e) Correlation chart with the maximum and minimum values of every spatial field showed, where the asterisk symbol (\*) indicates statistical significance ( $p$ -value < 0.05). Red (blue) correlation values depicted positive (negative) correlations.
